# Supplementary material for: Facile synthesis of sulfide Bi13S18I2 as a promising anode material for a lithium-ion battery
Source: Royal Society of Chemistry journal article supplement (doi:10.1039/d3ra04845d), 2023-01-01
Supplement: d3ra04845d1.pdf [file d3ra04845d1.pdf]

## Electronic Supplementary Information

### Facile Synthesis of Sulfide $\text{Bi}_{13}\text{S}_{18}\text{I}_2$ as a promising Anode

#### Material for Lithium ion Battery

Cheng-Lu Yang,<sup>a</sup> Cheng Liang,<sup>a</sup> Chao Gao,<sup>a,b</sup> Jun Guo,<sup>\*a,b</sup> Bu-Ming Chen,<sup>\*a,b,c</sup> Hui Huang<sup>a,b,c</sup>

1. Faculty of Metallurgical and Energy Engineering, Kunming University of Science and Technology, Kunming 650093, China
2. Research Center of Yunnan Metallurgical Electrode Materials Engineering Technology, Kunming 650106, China
3. Kunming Hendera Science and Technology Co., Ltd, Kunming 650106, China

\* Corresponding author: E-mail: [1038gj@kust.edu.cn](mailto:1038gj@kust.edu.cn); [bumchen@kust.edu.cn](mailto:bumchen@kust.edu.cn);

#### Materials and Methods

##### 2.1.1 The fabrication of $\text{Bi}_{13}\text{S}_{18}\text{I}_2$ (BSI) powders

Typically,  $\text{Bi}(\text{NO}_3)_3 \cdot 5\text{H}_2\text{O}$ , NaI, and  $\text{CH}_4\text{N}_2\text{S}$  were dissolved to glycol and deionized water by weight ratio. respectively. Then the solution was put into a high pressure reactor at  $120^\circ\text{C}$  for 12 h. After the reaction was over, the black precipitate obtained was filtered and washed by centrifugation with deionized water and anhydrous ethanol several times and dried in a drying oven at  $80^\circ\text{C}$  for 12 hours to obtain  $\text{Bi}_{13}\text{S}_{18}\text{I}_2$ . All chemicals were purchased from Aladdin without further purification.

##### 2.1.2 Preparation of graphene/BSI composite

Graphene and BSI were added to ethanol and deionized water with different weight ratios. After acoustic wave treated for 30 minutes, a uniform solution was formed, and then the reaction was carried out in a high-pressure reactor. The material obtained by the reaction was cleaned several times with water and alcohol, and dried in a drying oven for 12 h to get the final graphene/BSI. To obtain the best electrochemical performance, the graphene content was 100 mg, 150 mg and 200 mg, respectively. The

optimized 150 G/BSI samples are characterized in detail. To easy remember the samples, the BSI with different graphene content were denoted as 100G/BSI, 150 G/BSI, 200 G/BSI.

## 2.2 Material characterization

The morphologies of the samples were characterized by field emission scanning electron microscopy (FE-SEM, JEOL7800F) and transmission electron microscopy (TEM, JEOL 2010F). The crystal structure of the composite was analyzed by X-ray diffraction (XRD), SDT Q600. Raman spectra were taken on a DXR Raman microscope (Thermal Sciences Corporation, wavelength 532 nm). X-ray photoelectron spectroscopy (XPS) analysis was performed on an ESCALAB 250 Thermo Fisher Scientific.

## 2.3 Electrochemical measurements

The electrode material is obtained by conventional slurry coating method. The original synthetic material, acetylene black, adhesive according to the weight ratio of 8:1:1 mixed, after stirring for 2 h drops of n-methylpyrrolidone, to get a uniform mixture, after stirring for 24 h the mixture evenly coated on copper foil, in 80 °C blast drying oven after roller press, and then in 60 °C vacuum drying, A slurry containing about 1.0~1.5 mg cm<sup>-2</sup> active substance is obtained. The button half battery (CR2025) is assembled in an argon filled glove box (H<sub>2</sub>O, O<sub>2</sub> < 0.1 ppm). The reference electrode and opposite electrode are lithium foil. NEWARE CT-3008 is used to obtain the charge-discharge curve with current density of 0.5~ 0.05 A/g and voltage range of 0.01 ~ 3.0 V. The BSI samples with different graphene addition are denoted as BSI, 100 G/BSI, 150G/BSI, and 200 G/BSI, respectively.

## Figures

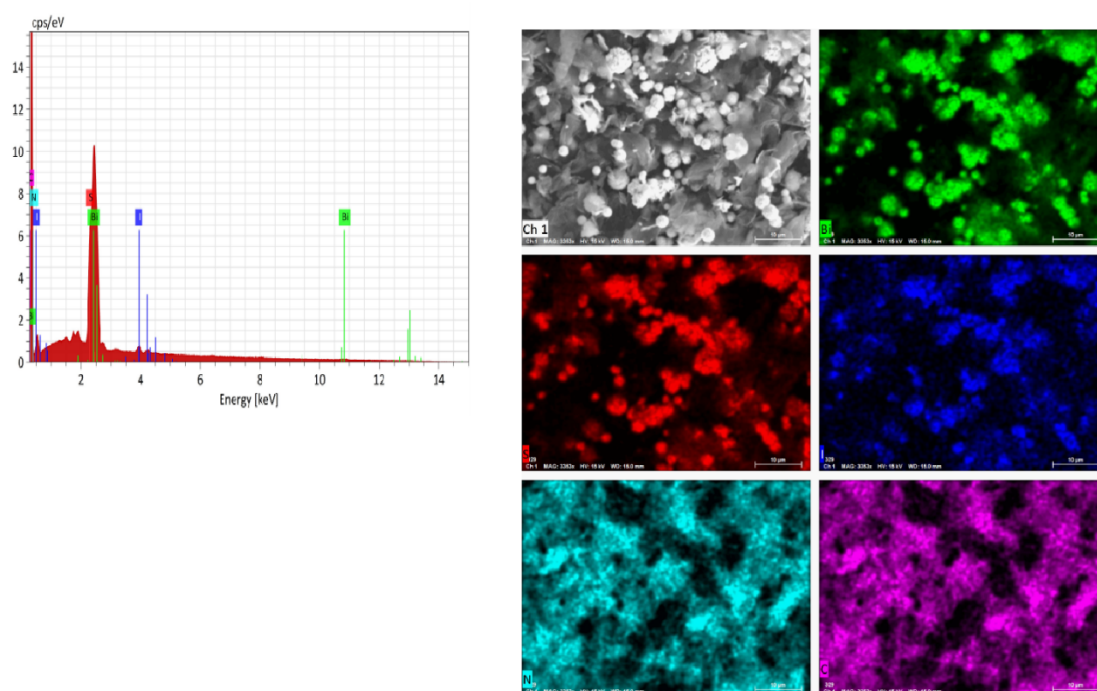

Fig. S1 EDS mapping of the 150 G/BSI.

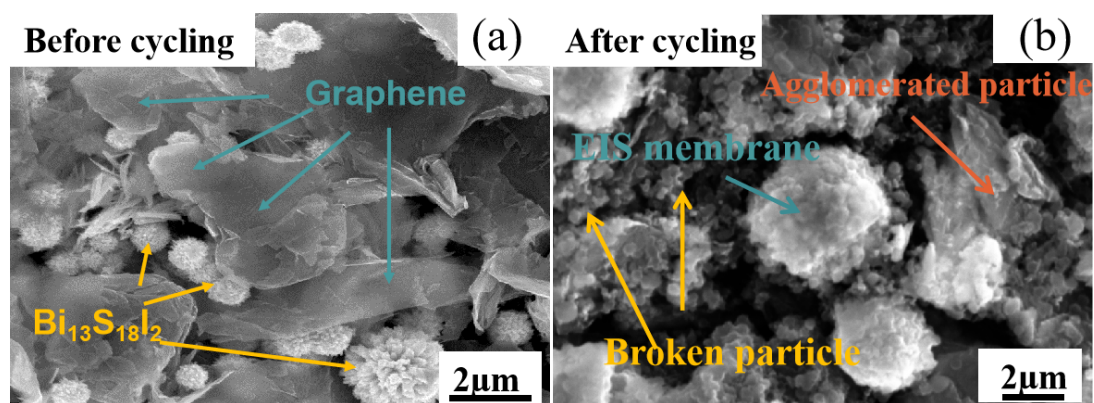

Fig. S2 (a) FE-TEM image of the 150 G/BSI electrode before cycling; (b) FE-TEM images of the 150 G/BSI electrode after 500 cycles.

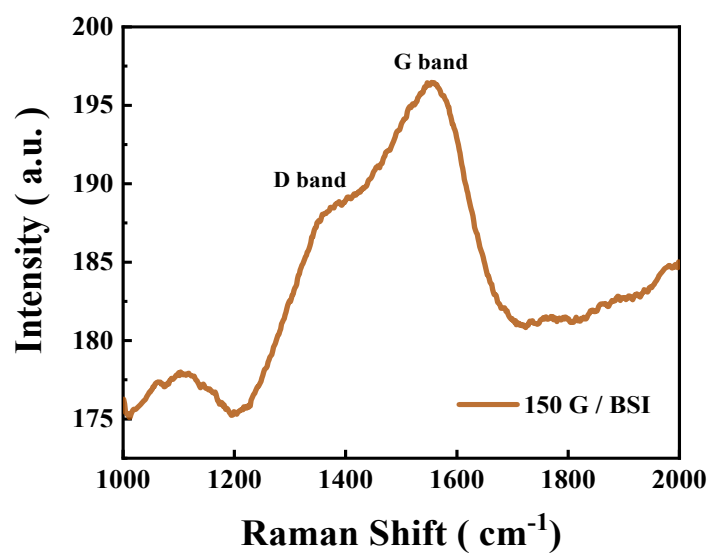

Fig. S3 Raman spectrum of the 150 G/BSI.

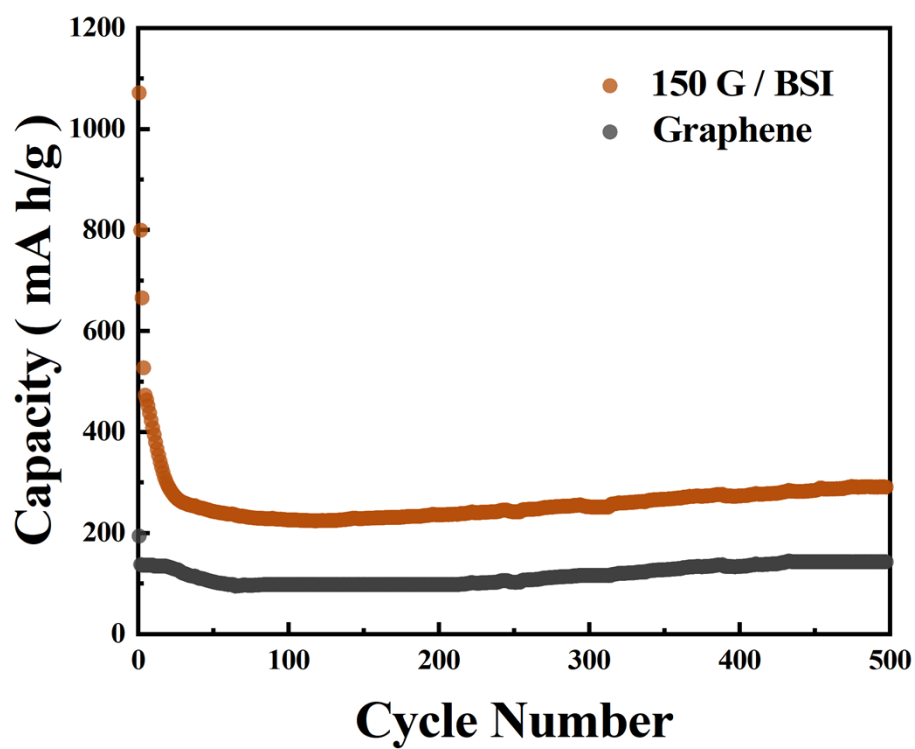

Fig. S4 Long Cycle Performance of Graphene and 150 G / BSI at 0.5 A/g

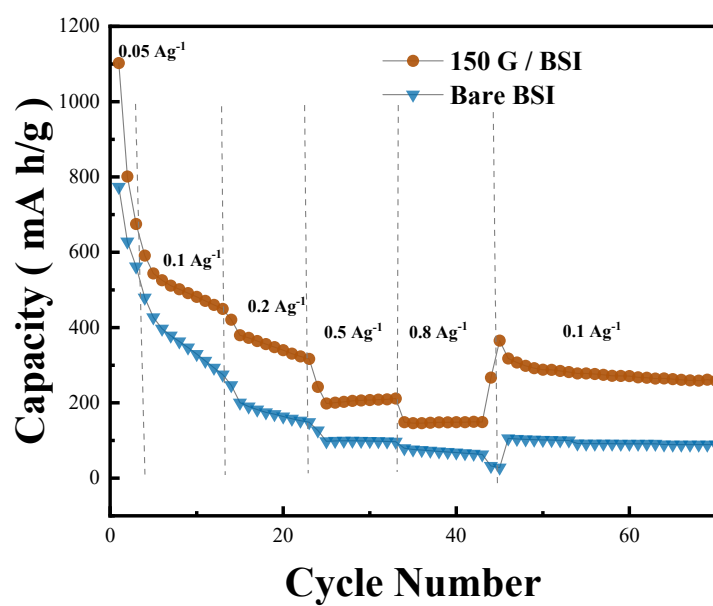

Fig. S5 Rate performance at different current densities of Bare BSI and 150 G/BSI.

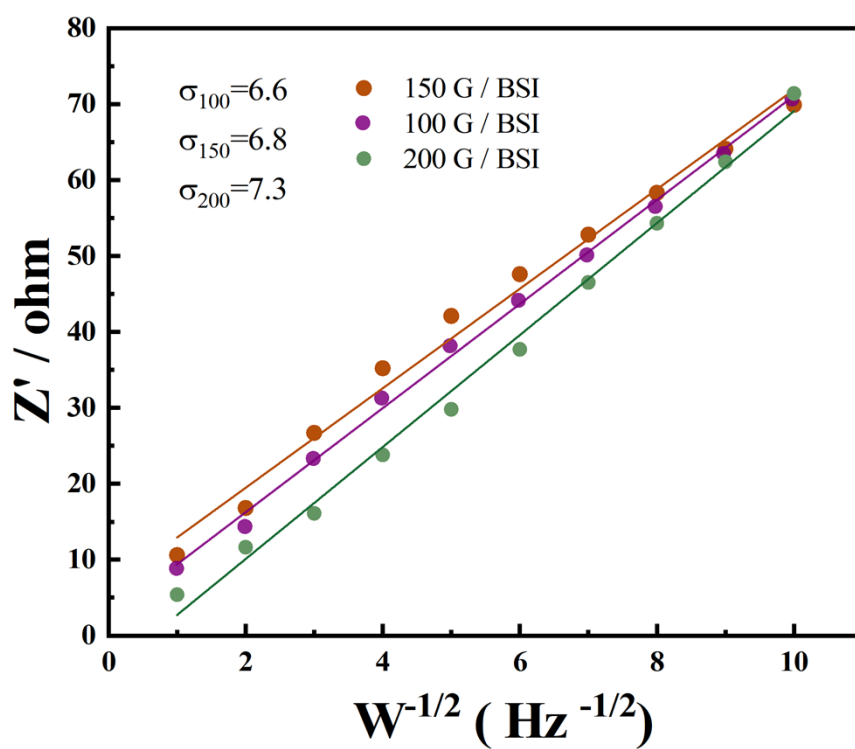

Fig. S6 Relation of  $Z'$ - $\omega^{-1/2}$  curves in the low-frequency region for the 100 G / BSI, 150 G / BSI, 200 G / BSI

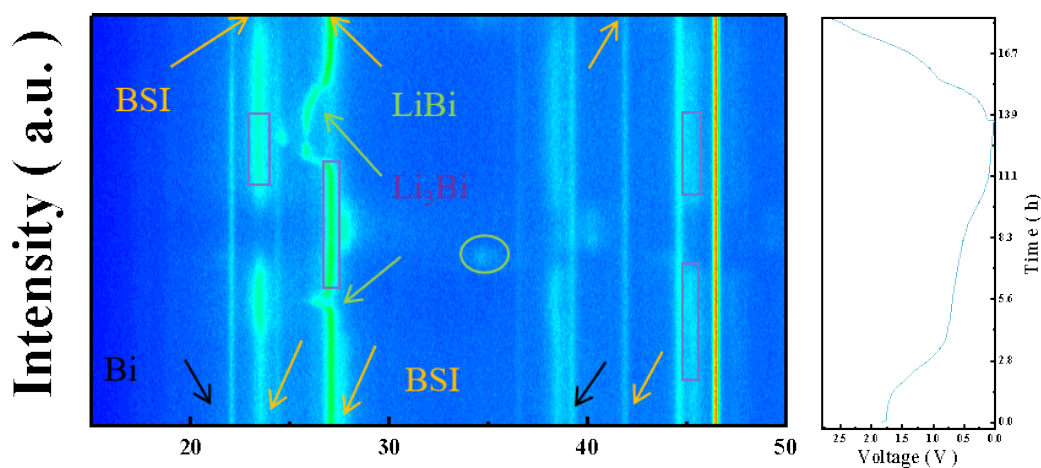

Fig. S7 In situ XRD patterns of the 150 G/BSI electrode during the first cycle and the corresponding discharge and charge curves.

Fig.S7 shows the reaction mechanism of the 150 G/BSI composite could be described as follows:  
In the discharge process

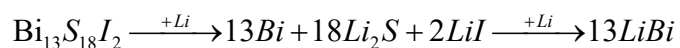

In the charge process

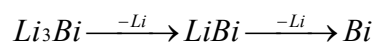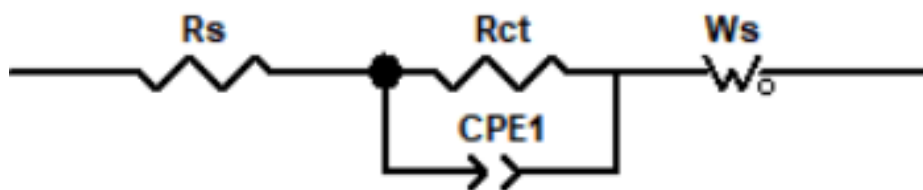

|            | Re/ $\Omega$ | Rct/ $\Omega$ |
|------------|--------------|---------------|
| 100 G /BSI | 9.89         | 108.1         |
| 150 G /BSI | 6.85         | 104.6         |
| 200 G /BSI | 11.55        | 111.2         |

Table S1 Equivalent electrical circuit and resistance values (in  $\Omega$ )
